# Supplementary material for: A Common CYFIP1 Variant at the 15q11.2 Disease Locus Is Associated with Structural Variation at the Language-Related Left Supramarginal Gyrus
Source: PubMed Central journal article supplement (PMC4924813; doi:10.1371/journal.pone.0158036), 2016-06-28

S1 Figure. Linkage disequilibrium (LD) structure of the Breakpoint 1 to Breakpoint 2 locus.

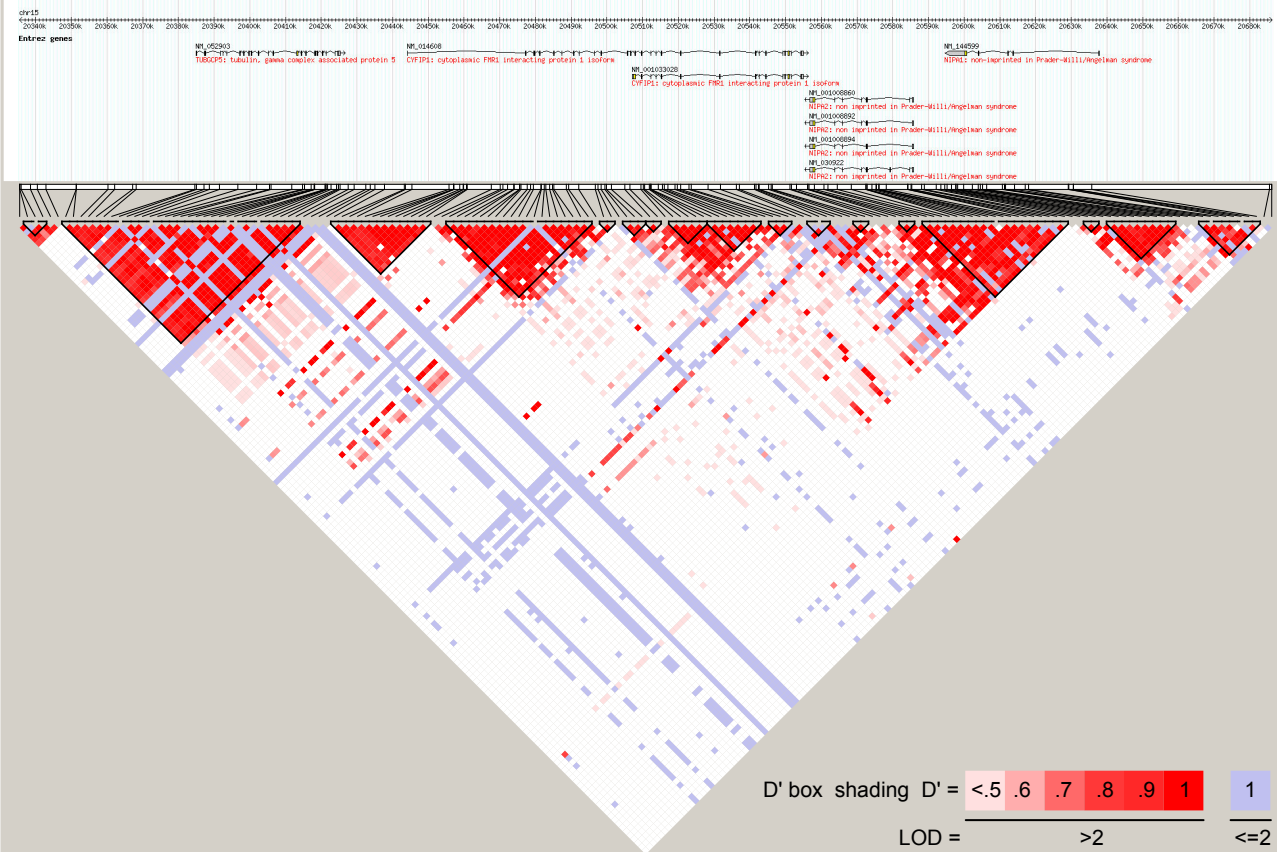

Supplement: pone.0158036.s001.pdf [file pone.0158036.s001.pdf]
